# Supplementary material for: Functional response of Neoseiulus californicus (Acari: Phytoseiidae) to Tetranychus urticae (Acari: Tetranychidae) at different temperatures
Source: PeerJ. 2023 Nov 27;11:e16461. doi: 10.7717/peerj.16461 (PMC10688301; doi:10.7717/peerj.16461)
Supplement: Supplemental Information 1 [file peerj-11-16461-s001.xlsx]

## Sheet: Raw Data,
Stage	Treatment	4	5	8	10	12	15	16	20	24	25		Stage	Treatment	8	10	15	16	20	24	25	30	32	40			Stage	Treatment	8	10	15	16	20	24	25	30	32	40		Stage	Treatment	8	10	15	16	20	24	25	30
		1	2	5	3	5	3	2	3	3	3				4	3	5	8	4	17	5	7	9	16					7	8	14	13	17	16	14	12	20	26				7	2	15	11	5	12	5	14
		2	1	4	4	3	2	1	4	6	4				3	4	7	6	7	10	4	11	10	14					2	9	5	16	13	15	16	23	15	30				7	9	8	10	9	4	9	12
	24°C	1	1	2	1	2	1	1	3	4	2			24°C	4	6	9	13	9	14	8	10	14	19				24°C	2	10	11	10	18	22	17	25	19	28			24°C	2	7	9	12	5	9	13	15
		1	2	6	6	7	4	4	7	8	11				5	7	11	12	15	18	13	21	18	25					4	5	9	15	16	19	23	21	25	33				5	6	12	9	16	19	16	23
															6	9	13	10	11	20	17	24	23	29					6	3	14	12	11	13	20	26	29	35				4	3	14	13	18	21	22	27
	27°C	1	2	1	2	9	12	5	1	4	5				5	7	5	8	11	7	8	8	20	26					6	9	5	6	7	12	16	17	19	23				7	6	11	11	12	7	12	22
		3	1	2	1	7	9	7	3	6	6				8	4	6	5	14	12	10	11	13	20					8	8	7	8	10	14	11	15	15	19				6	4	13	15	14	9	16	18
		1	2	4	3	8	11	9	8	9	8				7	6	10	12	16	15	13	14	18	23					6	9	9	10	12	9	10	25	24	15				4	6	10	12	15	11	15	13
Adult		2	3	5	6	11	13	14	15	16	14		Nymph	27°C	6	9	11	13	19	18	17	21	22	28			Larvae	27°C	5	7	12	14	17	18	23	22	27	28		Larvae	27°C	3	5	9	14	18	17	18	27
		1	4	7	4	6	10	10	9	18	19				4	5	13	9	12	21	20	24	25	30					4	5	13	11	16	21	19	20	30	34				5	7	8	10	9	23	11	25
	30°C	3	2	2	5	3	1	5	11	10	7			30°C	6	8	10	15	7	14	16	14	17	25				30°C	5	10	7	14	16	16	15	18	23	27			30°C	8	5	8	10	7	16	19	19
		1	3	4	3	5	3	7	9	8	10				5	6	6	7	11	16	18	12	19	28					7	4	10	13	13	12	17	20	21	30				7	9	10	15	11	21	21	12
		2	4	5	6	4	5	3	12	3	6				7	5	9	10	13	19	17	18	24	21					4	7	12	11	10	18	18	23	22	22				5	6	11	13	8	20	16	14
		1	3	6	9	9	7	10	17	14	13				4	9	12	13	17	21	23	22	27	26					6	8	14	15	17	19	16	27	28	33				3	7	13	12	16	22	23	24
		3	2	3	4	7	11	12	15	20	20				5	4	8	11	12	20	15	25	30	33					3	5	8	12	14	21	22	26	30	36				6	4	9	8	18	19	15	21
	33°C	1	3	5	5	6	7	8	9	7	11			33°C	6	6	7	11	14	19	13	23	27	22				33°C	8	10	9	14	19	17	20	26	24	32			33°C	8	10	11	9	17	18	16	21
		3	4	3	7	4	9	10	7	9	10				5	8	11	8	12	17	15	20	20	25					7	8	13	16	15	15	22	25	22	35				6	7	10	13	18	16	18	23
		2	1	6	4	7	5	5	12	13	12				7	9	9	14	18	16	17	21	25	19					5	9	14	13	17	19	17	23	27	28				5	9	13	12	15	12	20	25
		4	2	7	9	9	11	9	14	16	17				5	7	13	10	16	20	21	26	29	28					6	6	12	15	14	21	23	27	30	34				3	6	9	15	19	20	23	27
		1	3	4	6	5	12	13	10	18	20				4	5	8	12	13	22	19	24	21	32					4	4	11	9	12	18	15	20	24	36				4	2	14	9	12	22	21	20
	36°C	4	2	2	6	8	10	3	6	7	10			36°C	6	8	13	15	17	16	13	22	24	28				36°C	8	6	14	9	16	18	10	15	18	22			36°C	6	9	11	13	10	13	18	14
		2	1	4	4	5	9	5	9	12	12				7	9	11	14	15	17	15	20	27	26					6	5	11	12	12	16	14	17	15	19				4	5	9	15	13	10	20	17
		1	3	5	8	7	13	8	7	11	14				4	7	10	12	18	15	12	21	28	30					5	9	13	13	10	20	16	22	20	17				7	8	10	12	12	14	17	23
		3	4	6	9	11	12	12	13	15	19				3	6	12	13	12	21	22	24	23	33					4	7	10	15	18	22	18	24	26	28				5	6	12	10	16	17	21	25
		2	2	7	3	9	8	14	10	9	17				5	4	9	10	14	20	19	27	25	36					7	3	8	11	14	19	21	29	30	32				2	4	14	9	18	20	22	24
[truncated: 2 more columns]

## Sheet: Mean number of prey consumed
Number of prey consumed by adult female at different densities of each stage at particular temperature
Stage	Temperature	4	5	8	10	12	15	16	20	24	25	30	32	40
Adult	24°C	1.4	1.4	4	3.8	5.2	3.4	3.2	5.4	6.6	6.8
	27°C	1.6	2.4	3.8	3.2	8.2	11	9	7.2	10.6	10.4
	30°C	2	2.8	4	5.4	5.6	5.4	7.4	12.8	11	11.2
	33°C	2.2	2.6	5	6.2	6.2	8.8	9	10.4	12.6	14
	36°C	2.4	2.4	4.8	6	8	10.4	8.4	9	10.8	14.4
Nymph	24°C			4.4	5.8		9	9.8	9.2	15.8	9.4	14.6	14.8	20.6
	27°C			6	6.2		9	9.4	14.4	14.6	13.6	15.6	19.6	25.4
	30°C			5.4	6.4		9	11.2	12	18	17.8	18.2	23.4	26.6
	33°C			5.4	7		9.6	11	14.6	18.8	17	22.8	24.4	25.2
	36°C			5	6.8		11	12.8	15.2	17.8	16.2	22.8	25.4	30.6
Larvae	24°C			4.2	7		10.6	13.2	15	17	18	21.4	21.6	30.4
	27°C			5.8	7.6		9.2	9.8	12.4	14.8	15.8	19.8	23	23.8
	30°C			5	6.8		10.2	13	14	17.2	17.6	22.8	24.8	29.6
	33°C			6	7.4		11.8	13.4	15.4	18	19.4	24.2	25.4	33
	36°C			6	6		11.2	12	14	19	15.8	21.4	21.8	23.6
Egg	24°C			5	5.4		11.6	11	10.6	13	13	18.2	14.8	28
	27°C			4.4	5.8		10.2	12.4	13.6	13.4	14.4	19.4	16.4	28.8
	30°C			5.8	6.2		10.2	11.6	12	19.6	18.8	18	25.6	30.2
	33°C			5.2	6.8		11.4	11.6	16.2	17.6	19.6	23.2	27	29.8
	36°C			4.8	6.4		11.2	11.8	13.8	14.8	19.6	20.6	23.6	29.6

## Sheet: Data for fig 1
				Handling Time (Th)
Prey Stage	Mean Handling Time	Mean Attack Rate			24°C	27°C	30°C	33°C	36°C	Mean	SD	SE
Adult	0.01618	0.482011		Adult	0.0373	0.02	0.0158	0.0048	0.003	0.01618	0.0138203	0.00618065
Nymph	0.01042	0.658419		Nymph	0.013	0.0144	0.009	0.0036	0.0121	0.01042	0.00429674	0.00192156
Larva	0.00988	0.67248		Larvae	0.0214	0.0117	0.0111	0.004	0.0012	0.00988	0.00786492	0.0035173
Egg	0.00702	0.623582		Egg	0.0049	0.0031	0.0021	0.0125	0.0125	0.00702	0.00510216	0.00228175
				Attck Rate (a)
					24°C	27°C	30°C	33°C	36°C	Mean	SD	SE
				Adult	0.357398	0.411862	0.538677	0.541829	0.560287	0.482011	0.0913314	0.0408446
				Nymph	0.60868	0.749681	0.653296	0.666001	0.614439	0.658419	0.0566144	0.0253187
				Larvae	0.536913	0.772201	0.614024	0.733945	0.705318	0.67248	0.0956505	0.0427762
				Egg	0.6259	0.606391	0.673401	0.624571	0.587648	0.623582	0.031918	0.0142742
	Fig. 1 Mean attack rate (a) and Handling time (Th) of N. californicus at different stages of T. urticae.

## Sheet: Data for Fig.2
	Density
Adult	4	5	8	10	12	15	16	20	24	25
Mean number of prey consumed and SE	1.92±0.56	2.32±0.42	4.32±0.81	4.92±0.95	6.64±1.01	7.8±1.13	7.4±1.56	8.96±1.53	10.32±2.08	8.96±2.00
Nymph	8	10	15	16	20	24	25	30	32	40
Mean number of prey consumed and SE	5.2±0.59	6.44±0.89	9.52±1.14	10.8±1.18	13.08±1.40	17.00±1.52	14.80±1.86	18.80±2.21	21.52±1.93	25.68±2.11
																	Logarithmic
Larvae	8	10	15	16	20	24	25	30	32	40
Mean number of prey consumed and SE	5.52±0.72	6.88±1.08	10.48±1.45	12.12±1.17	14.08±1.41	16.92±1.39	17.28±1.68	21.76±1.91	23.16±2.11	27.84±2.21
Egg	8	10	15	16	20	24	25	30	32	40
Mean number of prey consumed and SE	5.16±0.84	6.08±0.99	10.92±0.97	11.68±1.02	12.84±1.67	15.68±2.11	17.08±1.56	20.20±2.21	21.48±2.32	29.28±2.37
	Adult
Initial prey density	4	5	8	10	12	15	16	20	24	25
Mean number of prey consumed	1.92	2.32	4.32	4.92	6.64	7.8	7.4	8.96	10.32	8.96
SE	0.56	0.42	0.81	0.95	1.01	1.13	1.56	1.53	2.08	2							Linear
	Nymph
Initial prey density	8	10	15	16	20	24	25	30	32	40
Mean number of prey consumed	5.2	6.44	9.52	10.8	13.08	17	14.8	18.8	21.52	25.68
SE	0.59	0.89	1.14	1.18	1.4	1.52	1.86	2.21	1.93	2.11
	Larvae
Initial prey density	8	10	15	16	20	24	25	30	32	40
Mean number of prey consumed	5.52	6.88	10.48	12.12	14.08	16.92	17.28	21.76	23.16	27.84
SE	0.72	1.08	1.45	1.17	1.41	1.39	1.68	1.91	2.11	2.21
	Egg
Initial prey density	8	10	15	16	20	24	25	30	32	40
Mean number of prey consumed	5.16	6.08	10.92	11.68	12.84	15.68	17.08	20.2	21.48	29.28
SE	0.84	0.99	0.97	1.02	1.67	2.11	1.56	2.21	2.32	2.37
																	Linear
														linear
																	Linear
					Fig. 2 Mean number of prey consumed (±SE) by adult females of N. californicus at different densities of various life stages of T. urticae

## Sheet: Fig 3
	Prey Density	4	5	8	10	12	15	16	20	24	25				Prey Density	8	10	15	16	20	24	25	30	32	40				Prey Density	8	10	15	16	20	24	25	30	32	40				Prey Density	8	10	15	16	20	24
	24°C	0.339	0.335	0.322	0.315	0.308	0.298	0.294	0.282	0.271	0.268				24°C	0.572	0.563	0.544	0.539	0.525	0.511	0.508	0.491	0.484	0.461				24°C	0.493	0.484	0.461	0.456	0.44	0.425	0.421	0.403	0.397	0.372				24°C	0.611	0.607	0.599	0.597	0.591	0.584
	27°C	0.399	0.396	0.386	0.381	0.375	0.367	0.364	0.354	0.344	0.342				27°C	0.688	0.674	0.642	0.637	0.614	0.593	0.587	0.563	0.554	0.52				27°C	0.72	0.708	0.68	0.675	0.654	0.635	0.63	0.608	0.599	0.567				27°C	0.596	0.594	0.588	0.587	0.583	0.578
	30°C	0.521	0.517	0.505	0.497	0.489	0.478	0.474	0.461	0.448	0.444				30°C	0.628	0.622	0.607	0.605	0.594	0.583	0.58	0.568	0.562	0.544				30°C	0.581	0.574	0.555	0.552	0.539	0.525	0.522	0.507	0.501	0.479				30°C	0.668	0.666	0.663	0.662	0.659	0.657
	33°C	0.535	0.534	0.529	0.527	0.524	0.521	0.519	0.514	0.509	0.508				33°C	0.655	0.652	0.647	0.645	0.64	0.635	0.634	0.628	0.625	0.616				33°C	0.717	0.713	0.702	0.7	0.692	0.684	0.682	0.673	0.669	0.655				33°C	0.586	0.577	0.557	0.553	0.534	0.523
	36°C	0.556	0.555	0.553	0.551	0.549	0.546	0.546	0.542	0.539	0.538				36°C	0.581	0.574	0.555	0.552	0.538	0.525	0.522	0.507	0.501	0.479				36°C	0.699	0.698	0.694	0.693	0.691	0.688	0.687	0.684	0.683	0.677				36°C	0.557	0.549	0.532	0.529	0.516	0.503
	S = a /1 + aThN0
[truncated: 4 more columns]

## Sheet: Adult
												24°C
Number of prey Adults consumed by adult female at different pest densities at particular temperatures											No.of prey (N)	No. of Replication	No. of Prey Killed (Na)	1/N	1/Na					1/N	1/Na
Temperature	Density	R1	R2	R3	R4	R5	Average				4	5	1.4	0.25	0.714286	Th	0.0373			0.25	0.714286
	4	1	2	1	1	2	1.4				5	5	1.4	0.2	0.714286	1/a	2.798			0.2	0.714286
	5	2	1	1	2	1	1.4				8	5	4	0.125	0.25	a	0.357398			0.125	0.25
24°C	8	5	4	2	6	3	4				10	5	3.8	0.1	0.263158	aTh	0.013331			0.1	0.263158
	10	3	4	1	6	5	3.8				12	5	5.2	0.0833333	0.192308	a/Th	9.58172			0.0833333	0.192308
	12	5	3	2	7	9	5.2				15	5	3.4	0.0666667	0.294118	1/Th	26.8097			0.0666667	0.294118
	15	3	2	1	4	7	3.4				16	5	3.2	0.0625	0.3125	S	0.410722			0.0625	0.3125
	16	2	1	1	4	8	3.2				20	5	5.4	0.05	0.185185					0.05	0.185185
	20	3	4	3	7	10	5.4				24	5	6.6	0.0416667	0.151515					0.0416667	0.151515
	24	3	6	4	8	12	6.6				25	5	6.8	0.04	0.147059					0.04	0.147059
	25	3	4	2	11	14	6.8
										27°C	No.of prey (N)	No. of Replication	No. of Prey Killed (Na)	1/N	1/Na
	4	1	3	1	2	1	1.6				4	5	1.6	0.25	0.625	Th	0.02
	5	2	1	2	3	4	2.4				5	5	2.4	0.2	0.416667	1/a	2.428
	8	1	2	4	5	7	3.8				8	5	3.8	0.125	0.263158	a	0.411862
	10	2	1	3	6	4	3.2				10	5	3.2	0.1	0.3125	aTh	0.00823723
27°C	12	9	7	8	11	6	8.2				12	5	8.2	0.0833333	0.121951	a/Th	20.5931
	15	12	9	11	13	10	11				15	5	11	0.0666667	0.0909091	1/Th	50
	16	5	7	9	14	10	9				16	5	9	0.0625	0.111111	S	0.444811
	20	1	3	8	15	9	7.2				20	5	7.2	0.05	0.138889
	24	4	6	9	16	18	10.6				24	5	10.6	0.0416667	0.0943396
	25	5	6	8	14	19	10.4				25	5	10.4	0.04	0.0961538
										30°C	No.of prey (N)	No. of Replication	No. of Prey Killed (Na)	1/N	1/Na
	4	3	1	2	1	3	2				4	5	2	0.25	0.5	Th	0.0158
	5	2	3	4	3	2	2.8				5	5	2.8	0.2	0.357143	1/a	1.8564
	8	2	4	5	6	3	4				8	5	4	0.125	0.25	a	0.538677
30°C	10	5	3	6	9	4	5.4				10	5	5.4	0.1	0.185185	aTh	0.0085111
	12	3	5	4	9	7	5.6				12	5	5.6	0.0833333	0.178571	a/Th	34.0935
	15	1	3	5	7	11	5.4				15	5	5.4	0.0666667	0.185185	1/Th	63.2911
	16	5	7	3	10	12	7.4				16	5	7.4	0.0625	0.135135
	20	11	9	12	17	15	12.8				20	5	12.8	0.05	0.078125
	24	10	8	3	14	20	11				24	5	11	0.0416667	0.0909091
	25	7	10	6	13	20	11.2				25	5	11.2	0.04	0.0892857
										33°C	No.of prey (N)	No. of Replication	No. of Prey Killed (Na)	1/N	1/Na
	4	1	3	2	4	1	2.2				4	5	2.2	0.25	0.454545	Th	0.0048
	5	3	4	1	2	3	2.6				5	5	2.6	0.2	0.384615	1/a	1.8456
	8	5	3	6	7	4	5				8	5	5	0.125	0.2	a	0.541829
33°C	10	5	7	4	9	6	6.2				10	5	6.2	0.1	0.16129	aTh	0.00260078
	12	6	4	7	9	5	6.2				12	5	6.2	0.0833333	0.16129	a/Th	112.881
	15	7	9	5	11	12	8.8				15	5	8.8	0.0666667	0.113636	1/Th	208.333
	16	8	10	5	9	13	9				16	5	9	0.0625	0.111111
	20	9	7	12	14	10	10.4				20	5	10.4	0.05	0.0961538
	24	7	9	13	16	18	12.6				24	5	12.6	0.0416667	0.0793651
	25	11	10	12	17	20	14				25	5	14	0.04	0.0714286
										36°C	No.of prey (N)	No. of Replication	No. of Prey Killed (Na)	1/N	1/Na
	4	4	2	1	3	2	2.4				4	5	2.4	0.25	0.416667	Th	0.003
	5	2	1	3	4	2	2.4				5	5	2.4	0.2	0.416667	1/a	1.7848
36°C	8	2	4	5	6	7	4.8				8	5	4.8	0.125	0.208333	a	0.560287
	10	6	4	8	9	3	6				10	5	6	0.1	0.166667	aTh	0.00168086
	12	8	5	7	11	9	8				12	5	8	0.0833333	0.125	a/Th	186.762
	15	10	9	13	12	8	10.4				15	5	10.4	0.0666667	0.0961538	1/Th	333.333
	16	3	5	8	12	14	8.4				16	5	8.4	0.0625	0.119048
	20	6	9	7	13	10	9				20	5	9	0.05	0.111111
	24	7	12	11	15	9	10.8				24	5	10.8	0.0416667	0.0925926
	25	10	12	14	19	17	14.4				25	5	14.4	0.04	0.0694444

## Sheet: Nymph
Number of Nymphs consumed by adult female at different pest densities at particular temperatures										No.of prey (N)	No. of Replication	No. of Prey Killed (Na)	1/N	1/Na
Temperature	Density	R1	R2	R3	R4	R5	Average			8	5	4.4	0.125	0.227273	Th	0.013
	8	4	3	4	5	6	4.4			10	5	5.8	0.1	0.172414	1/a	1.6429
	10	3	4	6	7	9	5.8			15	5	9	0.0666667	0.111111	a	0.60868
24°C	15	5	7	9	11	13	9			16	5	9.8	0.0625	0.102041	aTh	0.00791284
	16	8	6	13	12	10	9.8			20	5	9.2	0.05	0.108696	a/Th	46.8215
	20	4	7	9	15	11	9.2			24	5	15.8	0.0416667	0.0632911	1/Th	76.9231
	24	17	10	14	18	20	15.8			25	5	9.4	0.04	0.106383	r2	0.9359
	25	5	4	8	13	17	9.4			30	5	14.6	0.0333333	0.0684932
	30	7	11	10	21	24	14.6			32	5	14.8	0.03125	0.0675676
	32	9	10	14	18	23	14.8			40	5	20.6	0.025	0.0485437
	40	16	14	19	25	29	20.6
										No.of prey (N)	No. of Replication	No. of Prey Killed (Na)	1/N	1/Na
	8	5	8	7	6	4	6			8	5	6	0.125	0.166667	Th	0.0144
	10	7	4	6	9	5	6.2			10	5	6.2	0.1	0.16129	1/a	1.3339
	15	5	6	10	11	13	9			15	5	9	0.0666667	0.111111	a	0.749681
	16	8	5	12	13	9	9.4			16	5	9.4	0.0625	0.106383	aTh	0.0107954
27°C	20	11	14	16	19	12	14.4			20	5	14.4	0.05	0.0694444	a/Th	52.0612
	24	7	12	15	18	21	14.6			24	5	14.6	0.0416667	0.0684932	1/Th	69.4444
	25	8	10	13	17	20	13.6			25	5	13.6	0.04	0.0735294	r2	0.9533
	30	8	11	14	21	24	15.6			30	5	15.6	0.0333333	0.0641026
	32	20	13	18	22	25	19.6			32	5	19.6	0.03125	0.0510204
	40	26	20	23	28	30	25.4			40	5	25.4	0.025	0.0393701
										No.of prey (N)	No. of Replication	No. of Prey Killed (Na)	1/N	1/Na
	8	6	5	7	4	5	5.4			8	5	5.4	0.125	0.185185	Th	0.009
	10	8	6	5	9	4	6.4			10	5	6.4	0.1	0.15625	1/a	1.5307
	15	10	6	9	12	8	9			15	5	9	0.0666667	0.111111	a	0.653296
30°C	16	15	7	10	13	11	11.2			16	5	11.2	0.0625	0.0892857	aTh	0.00587966
	20	7	11	13	17	12	12			20	5	12	0.05	0.0833333	a/Th	72.5884
	24	14	16	19	21	20	18			24	5	18	0.0416667	0.0555556	1/Th	111.111
	25	16	18	17	23	15	17.8			25	5	17.8	0.04	0.0561798	r2	0.9846
	30	14	12	18	22	25	18.2			30	5	18.2	0.0333333	0.0549451
	32	17	19	24	27	30	23.4			32	5	23.4	0.03125	0.042735
	40	25	28	21	26	33	26.6			40	5	26.6	0.025	0.037594
										No.of prey (N)	No. of Replication	No. of Prey Killed (Na)	1/N	1/Na
	8	6	5	7	5	4	5.4			8	5	5.4	0.125	0.185185	Th	0.0036
	10	6	8	9	7	5	7			10	5	7	0.1	0.142857	1/a	1.5015
	15	7	11	9	13	8	9.6			15	5	9.6	0.0666667	0.104167	a	0.666001
33°C	16	11	8	14	10	12	11			16	5	11	0.0625	0.0909091	aTh	0.0023976
	20	14	12	18	16	13	14.6			20	5	14.6	0.05	0.0684932	a/Th	185
	24	19	17	16	20	22	18.8			24	5	18.8	0.0416667	0.0531915	1/Th	277.778
	25	13	15	17	21	19	17			25	5	17	0.04	0.0588235	r2	0.9922
	30	23	20	21	26	24	22.8			30	5	22.8	0.0333333	0.0438596
	32	27	20	25	29	21	24.4			32	5	24.4	0.03125	0.0409836
	40	22	25	19	28	32	25.2			40	5	25.2	0.025	0.0396825
										No.of prey (N)	No. of Replication	No. of Prey Killed (Na)	1/N	1/Na
	8	6	7	4	3	5	5			8	5	5	0.125	0.2	Th	0.0121
	10	8	9	7	6	4	6.8			10	5	6.8	0.1	0.147059	1/a	1.6275
	15	13	11	10	12	9	11			15	5	11	0.0666667	0.0909091	a	0.614439
	16	15	14	12	13	10	12.8			16	5	12.8	0.0625	0.078125	aTh	0.00743472
	20	17	15	18	12	14	15.2			20	5	15.2	0.05	0.0657895	a/Th	50.7801
36°C	24	16	17	15	21	20	17.8			24	5	17.8	0.0416667	0.0561798	1/Th	82.6446
	25	13	15	12	22	19	16.2			25	5	16.2	0.04	0.0617284	r2	0.9858
	30	22	20	21	24	27	22.8			30	5	22.8	0.0333333	0.0438596
	32	24	27	28	23	25	25.4			32	5	25.4	0.03125	0.0393701
	40	28	26	30	33	36	30.6			40	5	30.6	0.025	0.0326797

## Sheet: Larvae
Number of Larvae consumed by adult female at different pest densities at particular temperatures										No.of prey (N)	No. of Replication	No. of Prey Killed (Na)	1/N	1/Na
Temperature	Density	R1	R2	R3	R4	R5	Average			8	5	4.2	0.125	0.238095	Th	0.0214
	8	7	2	2	4	6	4.2			10	5	7	0.1	0.142857	1/a	1.8625
	10	8	9	10	5	3	7			15	5	10.6	0.0666667	0.0943396	a	0.536913
24°C	15	14	5	11	9	14	10.6			16	5	13.2	0.0625	0.0757576	aTh	0.0114899
	16	13	16	10	15	12	13.2			20	5	15	0.05	0.0666667	a/Th	25.0894
	20	17	13	18	16	11	15			24	5	17	0.0416667	0.0588235	1/Th	46.729
	24	16	15	22	19	13	17			25	5	18	0.04	0.0555556	r2	0.9461
	25	14	16	17	23	20	18			30	5	21.4	0.0333333	0.046729
	30	12	23	25	21	26	21.4			32	5	21.6	0.03125	0.0462963
	32	20	15	19	25	29	21.6			40	5	30.4	0.025	0.0328947
	40	26	30	28	33	35	30.4
										No.of prey (N)	No. of Replication	No. of Prey Killed (Na)	1/N	1/Na
27°C	8	6	8	6	5	4	5.8			8	5	5.8	0.125	0.172414	Th	0.0117
	10	9	8	9	7	5	7.6			10	5	7.6	0.1	0.131579	1/a	1.295
	15	5	7	9	12	13	9.2			15	5	9.2	0.0666667	0.108696	a	0.772201
	16	6	8	10	14	11	9.8			16	5	9.8	0.0625	0.102041	aTh	0.00903475
	20	7	10	12	17	16	12.4			20	5	12.4	0.05	0.0806452	a/Th	66.0001
	24	12	14	9	18	21	14.8			24	5	14.8	0.0416667	0.0675676	1/Th	85.4701
	25	16	11	10	23	19	15.8			25	5	15.8	0.04	0.0632911	r2	0.9743
	30	17	15	25	22	20	19.8			30	5	19.8	0.0333333	0.0505051
	32	19	15	24	27	30	23			32	5	23	0.03125	0.0434783
	40	23	19	15	28	34	23.8			40	5	23.8	0.025	0.0420168
										No.of prey (N)	No. of Replication	No. of Prey Killed (Na)	1/N	1/Na
	8	5	7	4	6	3	5			8	5	5	0.125	0.2	Th	0.0111
	10	10	4	7	8	5	6.8			10	5	6.8	0.1	0.147059	1/a	1.6286
	15	7	10	12	14	8	10.2			15	5	10.2	0.0666667	0.0980392	a	0.614024
	16	14	13	11	15	12	13			16	5	13	0.0625	0.0769231	aTh	0.00681567
	20	16	13	10	17	14	14			20	5	14	0.05	0.0714286	a/Th	55.3175
	24	16	12	18	19	21	17.2			24	5	17.2	0.0416667	0.0581395	1/Th	90.0901
30°C	25	15	17	18	16	22	17.6			25	5	17.6	0.04	0.0568182	r2	0.9882
	30	18	20	23	27	26	22.8			30	5	22.8	0.0333333	0.0438596
	32	23	21	22	28	30	24.8			32	5	24.8	0.03125	0.0403226
	40	27	30	22	33	36	29.6			40	5	29.6	0.025	0.0337838
										No.of prey (N)	No. of Replication	No. of Prey Killed (Na)	1/N	1/Na
33°C	8	8	7	5	6	4	6			8	5	6	0.125	0.166667	Th	0.004
	10	10	8	9	6	4	7.4			10	5	7.4	0.1	0.135135	1/a	1.3625
	15	9	13	14	12	11	11.8			15	5	11.8	0.0666667	0.0847458	a	0.733945
	16	14	16	13	15	9	13.4			16	5	13.4	0.0625	0.0746269	aTh	0.00293578
	20	19	15	17	14	12	15.4			20	5	15.4	0.05	0.0649351	a/Th	183.486
	24	17	15	19	21	18	18			24	5	18	0.0416667	0.0555556	1/Th	250
	25	20	22	17	23	15	19.4			25	5	19.4	0.04	0.0515464	r2	0.9963
	30	26	25	23	27	20	24.2			30	5	24.2	0.0333333	0.0413223
	32	24	22	27	30	24	25.4			32	5	25.4	0.03125	0.0393701
	40	32	35	28	34	36	33			40	5	33	0.025	0.030303
										No.of prey (N)	No. of Replication	No. of Prey Killed (Na)	1/N	1/Na
36°C	8	8	6	5	4	7	6			8	5	6	0.125	0.166667	Th	0.0012
	10	6	5	9	7	3	6			10	5	6	0.1	0.166667	1/a	1.4178
	15	14	11	13	10	8	11.2			15	5	11.2	0.0666667	0.0892857	a	0.705318
	16	9	12	13	15	11	12			16	5	12	0.0625	0.0833333	aTh	0.000846382
	20	16	12	10	18	14	14			20	5	14	0.05	0.0714286	a/Th	587.765
	24	18	16	20	22	19	19			24	5	19	0.0416667	0.0526316	1/Th	833.333
	25	10	14	16	18	21	15.8			25	5	15.8	0.04	0.0632911	r2	0.9543
	30	15	17	22	24	29	21.4			30	5	21.4	0.0333333	0.046729
	32	18	15	20	26	30	21.8			32	5	21.8	0.03125	0.0458716
	40	22	19	17	28	32	23.6			40	5	23.6	0.025	0.0423729
												#DIV/0!

## Sheet: Egg
Number of Eggs consumed by adult female at different pest densities at particular temperatures										No.of prey (N)	No. of Replication	No. of Prey Killed (Na)	1/N	1/Na
Temperature	Density	R1	R2	R3	R4	R5	Average			8	5	5	0.125	0.2	Th	0.0049
24°C	8	7	7	2	5	4	5			10	5	5.4	0.1	0.185185	1/a	1.5977
	10	2	9	7	6	3	5.4			15	5	11.6	0.0666667	0.0862069	a	0.6259
	15	15	8	9	12	14	11.6			16	5	11	0.0625	0.0909091	aTh	0.00306691
	16	11	10	12	9	13	11			20	5	10.6	0.05	0.0943396	a/Th	127.735
	20	5	9	5	16	18	10.6			24	5	13	0.0416667	0.0769231	1/Th	204.082
	24	12	4	9	19	21	13			25	5	13	0.04	0.0769231	r2	0.9335
	25	5	9	13	16	22	13			30	5	18.2	0.0333333	0.0549451
	30	14	12	15	23	27	18.2			32	5	14.8	0.03125	0.0675676
	32	7	13	10	18	26	14.8			40	5	28	0.025	0.0357143
	40	22	23	30	34	31	28
										No.of prey (N)	No. of Replication	No. of Prey Killed (Na)	1/N	1/Na
27°C	8	7	6	4	3	5	5			8	5	5	0.125	0.2	Th	0.0031
	10	6	4	6	5	7	5.6			10	5	5.6	0.1	0.178571	1/a	1.6491
	15	11	13	10	9	8	10.2			15	5	10.2	0.0666667	0.0980392	a	0.606391
	16	11	15	12	14	10	12.4			16	5	12.4	0.0625	0.0806452	aTh	0.00187981
	20	12	14	15	18	9	13.6			20	5	13.6	0.05	0.0735294	a/Th	195.61
	24	7	9	11	17	23	13.4			24	5	13.4	0.0416667	0.0746269	1/Th	322.581
	25	12	16	15	18	11	14.4			25	5	14.4	0.04	0.0694444	r2	0.9593
	30	22	18	13	27	25	21			30	5	21	0.0333333	0.047619
	32	9	12	14	20	27	16.4			32	5	16.4	0.03125	0.0609756
	40	27	25	32	37	23	28.8			40	5	28.8	0.025	0.0347222
										No.of prey (N)	No. of Replication	No. of Prey Killed (Na)	1/N	1/Na
30°C	8	8	7	5	3	6	5.8			8	5	5.8	0.125	0.172414	Th	0.0021
	10	5	9	6	7	4	6.2			10	5	6.2	0.1	0.16129	1/a	1.485
	15	8	10	11	13	9	10.2			15	5	10.2	0.0666667	0.0980392	a	0.673401
	16	10	15	13	12	8	11.6			16	5	11.6	0.0625	0.0862069	aTh	0.00141414
	20	7	11	8	16	18	12			20	5	12	0.05	0.0833333	a/Th	320.667
	24	16	21	20	22	19	19.6			24	5	19.6	0.0416667	0.0510204	1/Th	476.19
	25	19	21	16	23	15	18.8			25	5	18.8	0.04	0.0531915	r2	0.9681
	30	19	12	14	24	21	18			30	5	18	0.0333333	0.0555556
	32	27	21	22	28	30	25.6			32	5	25.6	0.03125	0.0390625
	40	30	29	22	32	38	30.2			40	5	30.2	0.025	0.0331126
										No.of prey (N)	No. of Replication	No. of Prey Killed (Na)	1/N	1/Na
33°C	8	8	6	5	3	4	5.2			8	5	5.2	0.125	0.192308	Th	0.0125
	10	10	7	9	6	2	6.8			10	5	6.8	0.1	0.147059	1/a	1.6011
	15	11	10	13	9	14	11.4			15	5	11.4	0.0666667	0.0877193	a	0.624571
	16	9	13	12	15	9	11.6			16	5	11.6	0.0625	0.0862069	aTh	0.00780713
	20	17	18	15	19	12	16.2			20	5	16.2	0.05	0.0617284	a/Th	49.9656
	24	18	16	12	20	22	17.6			24	5	17.6	0.0416667	0.0568182	1/Th	80
	25	16	18	20	23	21	19.6			25	5	19.6	0.04	0.0510204	r2	0.9939
	30	21	23	25	27	20	23.2			30	5	23.2	0.0333333	0.0431034
	32	25	28	22	29	31	27			32	5	27	0.03125	0.037037
	40	26	25	29	33	36	29.8			40	5	29.8	0.025	0.033557
										No.of prey (N)	No. of Replication	No. of Prey Killed (Na)	1/N	1/Na
36°C	8	6	4	7	5	2	4.8			8	5	4.8	0.125	0.208333	Th	0.0125
	10	9	5	8	6	4	6.4			10	5	6.4	0.1	0.15625	1/a	1.7017
	15	11	9	10	12	14	11.2			15	5	11.2	0.0666667	0.0892857	a	0.587648
	16	13	15	12	10	9	11.8			16	5	11.8	0.0625	0.0847458	aTh	0.0073456
	20	10	13	12	16	18	13.8			20	5	13.8	0.05	0.0724638	a/Th	47.0118
	24	13	10	14	17	20	14.8			24	5	14.8	0.0416667	0.0675676	1/Th	80
	25	18	20	17	21	22	19.6			25	5	19.6	0.04	0.0510204	r2	0.9846
	30	14	17	23	25	24	20.6			30	5	20.6	0.0333333	0.0485437
	32	19	21	23	26	29	23.6			32	5	23.6	0.03125	0.0423729
	40	22	28	30	32	36	29.6			40	5	29.6	0.025	0.0337838
